# Supplementary material for: Association of endotoxaemia with low grade inflammation, metabolic syndrome and distinct response to lipopolysaccharide in type 1 diabetes
Source: Research Square preprint supplement (doi:10.21203/rs.3.rs-2780541/v1), 2023-05-08
Supplement: Supplementary file 1 [file 3e4e23a69f36773338255c42.docx]

Supplementary materials for “Association of endotoxaemia with low grade inflammation, metabolic syndrome and distinct response to LPS in type 1 diabetes”


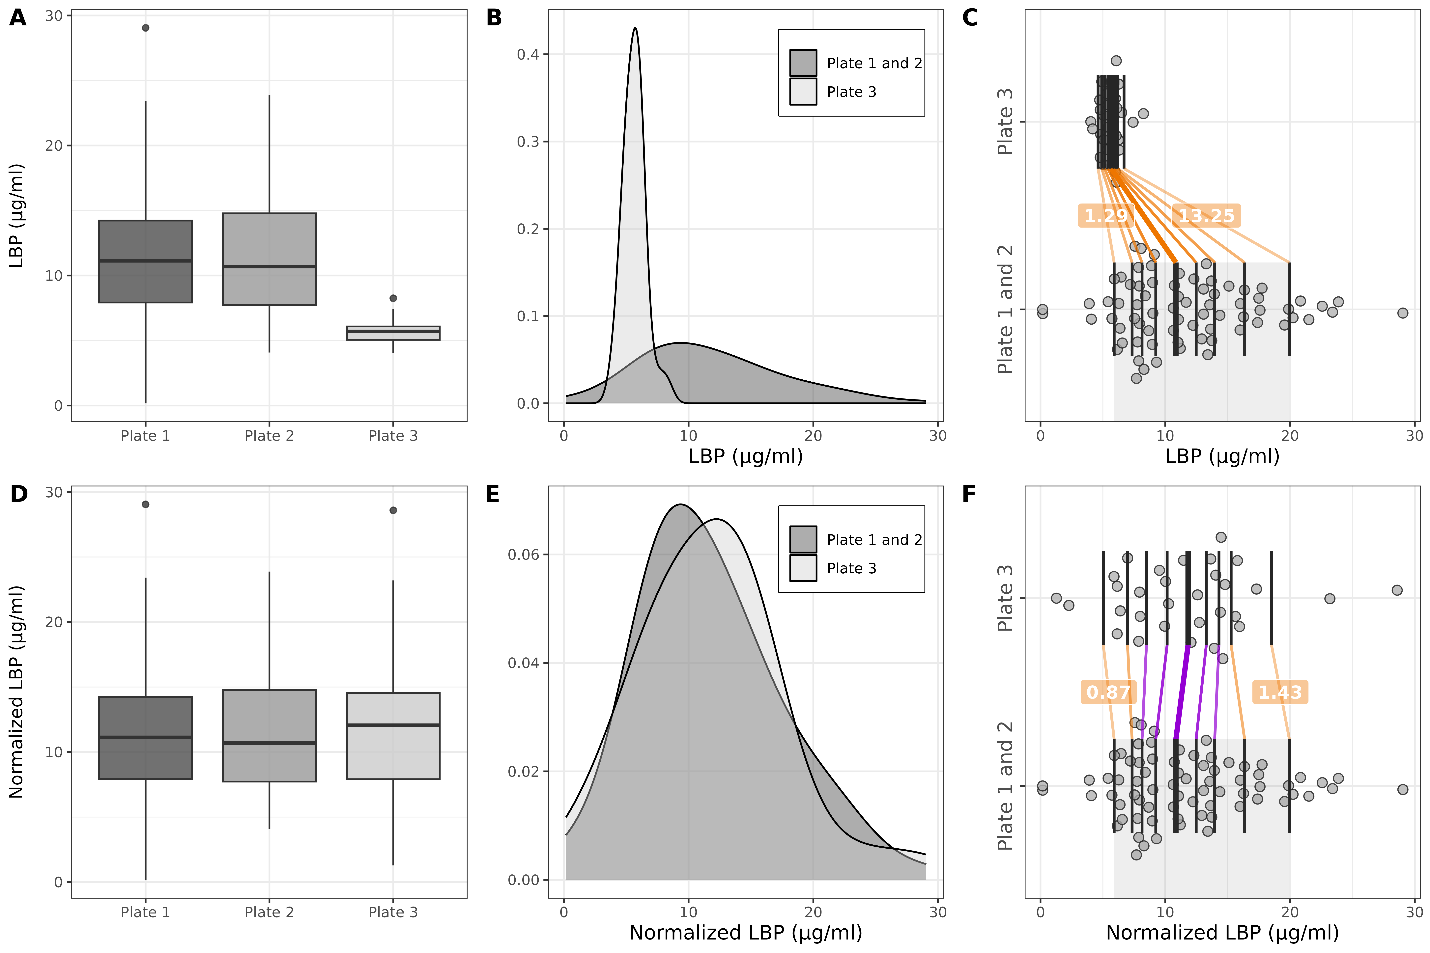


**Supplemental figure 1.** Illustrations for LBP before and after the normalization. Boxplots by plates, density plots and scatterplots with deciles for LBP raw data (upper panels) and after normalization using location-scale transformation between pooled plates 1 and 2 and plate 3 (lower panels), location parameter , scale parameter were used for transformation of plate 3.

| **Phenotype** | **Control (N=33)** | **T1D (N=74)** | **p** |
| --- | --- | --- | --- |
| **Male gender,** **N (%)** | 14 (42.4 %) | 28 (37.8 %) | 0.81 |
| **Age, years** | 35 (30 - 44) | 43 (34 - 51) | 0.013 |
| **BMI,** **kg/m2** | 24.3 (22.3 - 27.9) | 24.9 (22.6 - 28.4) | 0.39 |
| **Waist/height ratio** | 0.47 (0.44 - 0.51) | 0.49 (0.44 - 0.56) | 0.16 |
| **Smokers,** **N (%)** | 9 (27.3 %) | 20 (27.0 %) | 1.00 |
| **Hypertension,** **N (%)** | 7 (21.2 %) | 35 (47.3 %) | 0.019 |
| **Length of diabetes, Years** | - | 21 (13 - 32) | - |
| **Retinopathy,** **N (%)** | - | 32 (43.2 %) | - |
| **CVD,** **N (%)** | 0 (0 %) | 9 (12.2 %) | 0.086 |
| **On ACEI/ARB, N (%)** | 0 (0 %) | 15 (20.3 %) |  |
| **On lipid lowering medication, N (%)** | 2 (6.1 %) | 17 (23.0 %) | 0.066 |
| **Autoimmune thyroid disease,** **N (%)** | 1 (3 %) | 19 (25.7 %) | 0.012 |
| **Hemoglobin A1C, %** | 5.2 (5.0 - 5.5) | 7.7 (6.9 - 9.3) | <0.001 |
| **Hemoglobin A1C mmol/mol** | 31.4 (29.3 – 34.5) | 56.5 (49.1 – 73.6) | <0.001 |
| **Estimated glomerular filtration rate, ml/min/1.73m2** | 106 (94 - 113) | 108 (91 - 117) | 0.39 |
| **Albumin/creatinine ratio in urine, mg/mmol** | 0.32 (0.11 - 0.76) | 0.57 (0.23 - 1.84) | 0.013 |
| **Faecal calprotectine, µg/g** | 6.4 (3.9 - 10.3) | 6.3 (2.8 - 19.2 | 0.95 |
| **Faecal calprotectine>50 µg/g, N (%)** | 0 (0 %) | 6 (9.0 %) | 0.22 |
| **Total cholesterol, mmol/l** | 4.7 (4.5 - 5.1) | 5.0 (4.5 - 5.8) | 0.14 |
| **Low density lipoproteins, mmol/l** | 2.8 (2.4 - 3.2) | 3.0 (2.3 - 3.4) | 0.77 |
| **High density lipoproteins, mmol/l** | 1.43 (1.27 - 1.61) | 1.5 (1.3 - 1.9) | 0.05 |
| **Triglycerides, mmol/l** | 0.98 (0.79 - 1.65) | 1.2 (0.9 - 1.5) | 0.21 |
| **Alanine transaminase, U/l** | 21 (17 - 29) | 19 (15 - 28) | 0.18 |
| **Aspartate aminotransferase, U/l** | 25 (22 - 29) | 22 (19 - 31) | 0.13 |
| **Gamma-glutamyltransferase, U/l** | 16 (14 - 22) | 16 (13 - 23) | 0.93 |
| **Bilirubin, µmol/l** | 10.5 (7.1 – 15.0) | 9.3 (7.0 – 12.0) | 0.37 |
| **CRP, mg/l** | 0.5 (0.5 - 0.5) | 0.9 (0.5 - 2.9) | <0.001 |
| **Haemoglobin, g/l** | 140 (127 - 152) | 140 (132 - 149) | 0.84 |
| **Erythrocytes, 10x12\L** | 4.6 (4.2 - 5.1) | 4.7 (4.4 – 5.0) | 0.62 |
| **Leukocytes, 10x9/L** | 6.2 (5.2 - 6.9) | 6.2 (5.1 - 7.3) | 0.90 |
| **Thrombocytes, 10x9/L** | 269 (225 - 301) | 260 (230 - 288) | 0.86 |
| **eGDR** | 7.1 (5.5 - 7.7) | 3.3 (1.6 - 5.7) | <0.001 |
| **FLI** | 17.8 (6.6 - 34.6) | 21.7 (9.9 - 48.2) | 0.19 |
| **HSI** | 34.3 (30.8 - 40.2) | 33.4 (29.9 - 39.5) | 0.30 |
| **Metabolic syndrome** | 4 (12.1 %) | 31 (41.9 %) | 0.005 |

**Supplemental Table 1.** Characteristics of subjects.For categorical variables data are presented as counts (%), the equality of proportions in control and T1D group was tested using chi-square test for equality of proportions. For continuous variables data are presented as medians (IQR), the comparisons between control and T1D group was performed using Wilcoxon test. BMI – body mass index. CVD – cardiovascular disease. ACEI – angiotensin converting enzyme inhibitors. ARB angiotensin receptor blockers. eGDR – estimated glucose disposal rate. FLI – fatty liver index. HSI – hepatic steatosis index.

| **Variable** | **No metabolic syndrome (N = 43)** | **Metabolic syndrome (N = 31)** | **P Wilcoxon** | **P Lepage** | **P KS test** |
| --- | --- | --- | --- | --- | --- |
| **CRO, mg/l** | 0.5 (0.5 - 1.7) | 1.9 (0.6 - 4.5) | 0.004 | <0.001 | <0.001 |
| **hsCRP, mg/l** | 0.80 (0.49 - 1.53) | 1.23 (0.38 - 2.17) | 0.41 | 0.55 | 0.39 |
| **LPS, EU/ml** | 0.34 (0.30 - 0.40) | 0.42 (0.35 - 0.56) | 0.009 | 0.018 | 0.009 |
| **EndoCAb IgG, GMU/ml** | 89.5 (67.1 - 150.2) | 96.0 (59.1 - 141.6) | 0.84 | 0.88 | 0.85 |
| **Endo CAb IgM, MMU/ml** | 46.6 (34.2 - 85.2) | 43.7 (31.3 - 60.4) | 0.33 | 0.24 | 0.18 |
| **LBP, µg/ml** | 11.1 (7.9 - 16.3) | 11.1 (7.9 - 13.3) | 0.89 | 0.20 | 0.54 |
| **LPS/HDL** | 0.22 (0.17 - 0.26) | 0.28 (0.24 - 0.38) | 0.001 | 0.004 | 0.003 |
| **Calprotectin, µg/g** | 3.8 (2.7 - 8.6) | 12.5 (3.2 - 18.4) | 0.18 | 0.40 | 0.057 |

**Supplemental Table 2.** Inflammatory marker analysis in patients with T1D stratified by metabolic syndrome.

KS – Kolmogorov-Smirnov test for equality of two distributions.

| **Variable** | **n** | **m** | **Decile 1**  **(10%)** | **Decile 2**  **(20%)** | **Decile 3**  **(30%)** | **Decile 4**  **(40%)** | **Decile 5**  **(50%)** | **Decile 6**  **(60%)** | **Decile 7**  **(70%)** | **Decile 8**  **(80%)** | **Decile 9**  **(90%)** |
| --- | --- | --- | --- | --- | --- | --- | --- | --- | --- | --- | --- |
| **hsCRP, mg/l** | 42 | 28 | -0.09 (-0.28,0.15), p=0.44 | 0 (-0.24,0.33), p=0.971 | 0.09 (-0.22,0.53), p=0.595 | 0.2 (-0.21,0.76), p=0.371 | 0.34 (-0.22,1.01), p=0.25 | 0.48 (-0.22,1.34), p=0.182 | 0.62 (-0.29,1.67), p=0.159 | 0.78 (-1.24,2.49), p=0.414 | 0 (-2.14,2.83), p=0.998 |
| **LPS, EU/ml** | 42 | 29 | 0.01 (-0.03,0.05), p=0.78 | 0.03 (-0.01,0.08), p=0.193 | 0.05 (0,0.1), p=0.044 | 0.07 (0.02,0.13), p=0.01 | 0.09 (0.03,0.17), p=0.002 | 0.11 (0.04,0.21), p=0.002 | 0.15 (0.05,0.24), p=0.004 | 0.17 (0.05,0.26), p=0.013 | 0.16 (-0.02,0.27), p=0.091 |
| **EndoCAb IgG, GMU/ml** | 41 | 29 | -11.74 (-30.66,7.65), p=0.232 | -8.35 (-29.38,14.77), p=0.472 | -5.21 (-27.25,19.49), p=0.666 | -1.08 (-24.89,24.83), p=0.931 | 3.4 (-24.59,31.71), p=0.804 | 6.61 (-37.38,39.49), p=0.701 | 0.76 (-47.83,47.57), p=0.978 | -8.9 (-55.47,50.36), p=0.72 | -5.56 (-151.01,130.5), p=0.869 |
| **EndoCAb IgM, MMU/ml** | 42 | 28 | 1.37 (-8.72,11.15), p=0.791 | -0.23 (-10.52,9.65), p=0.964 | -1.78 (-12.92,8.83), p=0.738 | -3.67 (-18.01,8.55), p=0.555 | -6.77 (-25.8,7.96), p=0.391 | -12.6 (-33.33,5.95), p=0.206 | -19.83 (-41.22,1.08), p=0.063 | -27.32 (-54.53,14.25), p=0.15 | -25 (-141.55,75.6), p=0.281 |
| **LBP, µg/ml** | 42 | 29 | 2.45 (0.56,4.99), p=0.01 | 1.49 (-0.45,3.71), p=0.134 | 0.92 (-1.25,3.11), p=0.404 | 0.43 (-2.02,2.7), p=0.722 | -0.14 (-2.9,2.28), p=0.914 | -0.91 (-4.18,1.79), p=0.523 | -2.02 (-5.84,1.34), p=0.233 | -3.54 (-7.34,2.49), p=0.16 | -3.64 (-9.13,4.79), p=0.395 |
| **LPS/HDL ratio** | 42 | 29 | 0.04 (0,0.08), p=0.079 | 0.05 (0,0.09), p=0.037 | 0.06 (0.01,0.1), p=0.018 | 0.06 (0.02,0.11), p=0.007 | 0.07 (0.02,0.13), p=0.003 | 0.08 (0.03,0.17), p=0.001 | 0.1 (0.03,0.3), p=0.002 | 0.19 (0.04,0.35), p=0.004 | 0.28 (0.09,0.48), p=0.004 |
| **Calprotectin, µg/g** | 35 | 27 | -0.88 (-2.77,1.58), p=0.441 | 0.61 (-1.73,4.13), p=0.656 | 2.22 (-0.78,7.25), p=0.172 | 4.3 (0.23,9.98), p=0.036 | 6.9 (1.24,11.81), p=0.014 | 8.72 (2.47,13.13), p=0.011 | 9.39 (-13.65,13.98), p=0.18 | 5.35 (-18.29,14.99), p=1 | -9.99 (-21.82,25.46), p=0.218 |

**Supplemental Table 3.** Comparisons of deciles of inflammatory markers in T1D patients stratified according to the presence of metabolic syndrome.

n – complete cases in T1D patients without metabolic syndrome; m – complete cases in T1D patients with metabolic syndrome.

| **Variable** | **CRO, mg/l** | **hsCRP, mg/l** | **LPS, EU/ml** | **endoCAb IgG, GMU/ml** | **endoCAb IgM, MMU/ml** | **LBP, µg/ml** | **LPS/HDL** | **Calprotectin, µg/g** |
| --- | --- | --- | --- | --- | --- | --- | --- | --- |
| **Serum glucose** | 0.03, (-0.2, 0.26), p=0.786 | 0.12, (-0.12, 0.34), p=0.337 | 0.04, (-0.2, 0.27), p=0.742 | 0, (-0.23, 0.24), p=0.976 | -0.08, (-0.31, 0.16), p=0.512 | 0.12, (-0.12, 0.34), p=0.336 | 0.19, (-0.05, 0.41), p=0.109 | 0.08, (-0.16, 0.32), p=0.496 |
| **HbA1c** | 0.03, (-0.2, 0.25), p=0.825 | 0.11, (-0.13, 0.34), p=0.368 | -0.03, (-0.26, 0.21), p=0.833 | 0.27, (0.03, 0.47), p=0.026 | 0.11, (-0.13, 0.34), p=0.366 | 0.05, (-0.19, 0.28), p=0.707 | 0.05, (-0.19, 0.28), p=0.706 | 0.03, (-0.21, 0.27), p=0.783 |
| **eGFR** | -0.24, (-0.45, -0.01), p=0.038 | -0.02, (-0.26, 0.21), p=0.861 | -0.06, (-0.29, 0.18), p=0.614 | -0.1, (-0.33, 0.13), p=0.391 | -0.21, (-0.43, 0.03), p=0.079 | 0.07, (-0.17, 0.29), p=0.584 | 0.08, (-0.16, 0.31), p=0.5 | 0.11, (-0.13, 0.34), p=0.377 |
| **Albumine/creatinine ratio in urine** | 0.13, (-0.11, 0.35), p=0.277 | 0.12, (-0.13, 0.35), p=0.342 | -0.19, (-0.41, 0.06), p=0.128 | -0.03, (-0.27, 0.21), p=0.809 | -0.07, (-0.31, 0.17), p=0.544 | -0.03, (-0.26, 0.21), p=0.807 | -0.11, (-0.34, 0.13), p=0.352 | 0.1, (-0.15, 0.33), p=0.436 |
| **Weight** | 0.38, (0.16, 0.57), p=0.001 | 0.07, (-0.17, 0.3), p=0.568 | 0.04, (-0.2, 0.27), p=0.751 | -0.08, (-0.31, 0.16), p=0.496 | 0.02, (-0.21, 0.25), p=0.862 | -0.01, (-0.25, 0.22), p=0.916 | 0.06, (-0.18, 0.29), p=0.617 | -0.07, (-0.3, 0.18), p=0.595 |
| **Body mass index** | 0.55, (0.35, 0.7), p=0 | 0.17, (-0.07, 0.39), p=0.155 | 0.14, (-0.09, 0.37), p=0.23 | 0.01, (-0.22, 0.25), p=0.917 | 0.01, (-0.22, 0.25), p=0.918 | 0.05, (-0.19, 0.28), p=0.697 | 0.1, (-0.14, 0.33), p=0.412 | -0.01, (-0.25, 0.23), p=0.916 |
| **Waist/height ratio** | 0.47, (0.26, 0.64), p=0 | 0.23, (-0.01, 0.44), p=0.057 | 0.14, (-0.1, 0.36), p=0.243 | -0.08, (-0.31, 0.16), p=0.508 | -0.11, (-0.34, 0.12), p=0.345 | 0.03, (-0.2, 0.26), p=0.781 | 0.16, (-0.08, 0.38), p=0.193 | -0.09, (-0.32, 0.15), p=0.473 |
| **eGDR** | -0.26, (-0.46, -0.03), p=0.027 | -0.28, (-0.48, -0.04), p=0.02 | 0.01, (-0.23, 0.24), p=0.967 | -0.05, (-0.28, 0.18), p=0.664 | 0.07, (-0.17, 0.3), p=0.572 | 0.06, (-0.18, 0.29), p=0.632 | -0.06, (-0.29, 0.18), p=0.63 | 0.04, (-0.2, 0.28), p=0.743 |
| **HSI** | 0.52, (0.31, 0.68), p=0 | 0.21, (-0.03, 0.43), p=0.088 | 0.13, (-0.11, 0.36), p=0.283 | 0.04, (-0.21, 0.27), p=0.77 | 0.04, (-0.2, 0.28), p=0.728 | -0.03, (-0.26, 0.21), p=0.832 | 0.14, (-0.1, 0.37), p=0.25 | -0.06, (-0.3, 0.19), p=0.624 |
| **FLI** | 0.48, (0.27, 0.64), p=0 | 0.22, (-0.02, 0.43), p=0.07 | 0.24, (0.01, 0.45), p=0.04 | -0.08, (-0.31, 0.16), p=0.514 | -0.06, (-0.29, 0.17), p=0.603 | 0.06, (-0.18, 0.29), p=0.63 | 0.23, (-0.01, 0.44), p=0.053 | -0.06, (-0.29, 0.18), p=0.641 |
| **ALT** | 0.02, (-0.21, 0.25), p=0.859 | -0.04, (-0.27, 0.2), p=0.742 | -0.07, (-0.3, 0.17), p=0.575 | -0.09, (-0.32, 0.15), p=0.445 | -0.07, (-0.3, 0.16), p=0.543 | -0.07, (-0.29, 0.17), p=0.585 | -0.04, (-0.27, 0.19), p=0.726 | -0.02, (-0.26, 0.22), p=0.883 |
| **AST** | 0, (-0.23, 0.23), p=0.996 | -0.07, (-0.31, 0.17), p=0.568 | -0.1, (-0.33, 0.14), p=0.424 | 0, (-0.24, 0.24), p=0.976 | -0.14, (-0.37, 0.1), p=0.257 | 0.03, (-0.21, 0.27), p=0.789 | -0.19, (-0.41, 0.05), p=0.115 | 0.07, (-0.17, 0.32), p=0.556 |
| **GGT** | 0.14, (-0.09, 0.36), p=0.239 | 0.05, (-0.19, 0.28), p=0.689 | -0.04, (-0.27, 0.2), p=0.771 | -0.21, (-0.43, 0.03), p=0.076 | -0.06, (-0.29, 0.17), p=0.6 | -0.01, (-0.24, 0.23), p=0.954 | -0.07, (-0.3, 0.17), p=0.568 | -0.05, (-0.29, 0.19), p=0.659 |
| **Transglutaminase IgA** | -0.04, (-0.27, 0.19), p=0.738 | -0.21, (-0.43, 0.03), p=0.081 | 0.07, (-0.16, 0.3), p=0.541 | 0.01, (-0.22, 0.25), p=0.913 | 0.11, (-0.13, 0.34), p=0.379 | 0.04, (-0.19, 0.28), p=0.717 | 0.05, (-0.18, 0.28), p=0.666 | -0.28, (-0.49, -0.04), p=0.022 |
| **Total bilirubin** | -0.18, (-0.4, 0.05), p=0.117 | -0.16, (-0.38, 0.08), p=0.182 | 0, (-0.24, 0.23), p=0.968 | -0.1, (-0.33, 0.14), p=0.399 | 0.03, (-0.2, 0.27), p=0.779 | 0, (-0.24, 0.23), p=0.967 | -0.06, (-0.28, 0.18), p=0.648 | -0.14, (-0.37, 0.1), p=0.251 |
| **Erythrocytes** | -0.03, (-0.25, 0.2), p=0.816 | 0, (-0.24, 0.23), p=0.991 | 0.2, (-0.03, 0.42), p=0.091 | -0.04, (-0.27, 0.2), p=0.765 | 0.1, (-0.14, 0.33), p=0.393 | -0.01, (-0.24, 0.22), p=0.92 | 0.26, (0.02, 0.47), p=0.03 | 0.09, (-0.16, 0.32), p=0.494 |
| **Hemoglobin** | -0.15, (-0.37, 0.08), p=0.207 | -0.06, (-0.29, 0.18), p=0.623 | 0.18, (-0.06, 0.4), p=0.14 | -0.2, (-0.42, 0.04), p=0.1 | 0.04, (-0.19, 0.28), p=0.715 | -0.07, (-0.3, 0.16), p=0.549 | 0.33, (0.1, 0.53), p=0.005 | 0.03, (-0.21, 0.27), p=0.792 |
| **Leukocytes** | 0.1, (-0.13, 0.32), p=0.391 | 0.18, (-0.06, 0.4), p=0.13 | -0.06, (-0.29, 0.18), p=0.62 | -0.07, (-0.3, 0.17), p=0.589 | -0.06, (-0.29, 0.17), p=0.605 | 0.15, (-0.09, 0.37), p=0.211 | 0.04, (-0.19, 0.27), p=0.723 | -0.07, (-0.3, 0.18), p=0.588 |
| **Total cholesterol** | 0.29, (0.06, 0.49), p=0.013 | 0.13, (-0.11, 0.36), p=0.276 | 0.04, (-0.2, 0.27), p=0.746 | 0.18, (-0.06, 0.4), p=0.137 | 0.07, (-0.17, 0.3), p=0.555 | 0.2, (-0.04, 0.42), p=0.092 | -0.18, (-0.39, 0.06), p=0.142 | 0.14, (-0.11, 0.37), p=0.263 |
| **High density cholestrol** | 0.16, (-0.07, 0.38), p=0.171 | 0.13, (-0.1, 0.36), p=0.267 | -0.17, (-0.39, 0.06), p=0.146 | 0.32, (0.09, 0.52), p=0.006 | 0.26, (0.02, 0.47), p=0.028 | 0.12, (-0.12, 0.34), p=0.324 | -0.7, (-0.81, -0.54), p=0 | -0.06, (-0.3, 0.18), p=0.614 |
| **Low density cholesterol** | 0.21, (-0.02, 0.42), p=0.075 | 0.04, (-0.19, 0.28), p=0.723 | -0.08, (-0.31, 0.15), p=0.48 | 0.04, (-0.19, 0.27), p=0.729 | -0.05, (-0.28, 0.19), p=0.683 | 0.17, (-0.07, 0.39), p=0.164 | -0.01, (-0.24, 0.23), p=0.95 | 0.22, (-0.03, 0.44), p=0.08 |
| **Tryglicerides** | 0.12, (-0.11, 0.34), p=0.312 | 0.13, (-0.11, 0.36), p=0.282 | 0.49, (0.28, 0.66), p=0 | -0.08, (-0.31, 0.16), p=0.537 | 0, (-0.23, 0.24), p=0.982 | -0.01, (-0.24, 0.22), p=0.929 | 0.52, (0.31, 0.68), p=0 | 0.04, (-0.21, 0.27), p=0.776 |
| **Diabetes duration** | 0.14, (-0.09, 0.36), p=0.224 | 0.15, (-0.09, 0.37), p=0.226 | -0.09, (-0.32, 0.15), p=0.463 | -0.07, (-0.3, 0.17), p=0.576 | 0.11, (-0.13, 0.34), p=0.354 | -0.09, (-0.31, 0.15), p=0.478 | -0.22, (-0.43, 0.02), p=0.069 | 0.02, (-0.22, 0.26), p=0.845 |
| **CRP** | - | 0.61, (0.42, 0.75), p=0 | 0.13, (-0.11, 0.35), p=0.296 | 0.16, (-0.08, 0.38), p=0.192 | 0.01, (-0.23, 0.24), p=0.951 | 0.18, (-0.06, 0.4), p=0.137 | -0.04, (-0.27, 0.2), p=0.767 | -0.16, (-0.39, 0.09), p=0.197 |
| **hsCRP** | 0.61, (0.42, 0.75), p=0 | - | 0.18, (-0.06, 0.4), p=0.14 | 0.22, (-0.02, 0.44), p=0.07 | 0, (-0.24, 0.23), p=0.972 | 0.36, (0.13, 0.55), p=0.002 | 0.01, (-0.23, 0.24), p=0.932 | -0.15, (-0.38, 0.11), p=0.256 |
| **LPS** | 0.13, (-0.11, 0.35), p=0.296 | 0.18, (-0.06, 0.4), p=0.14 | - | 0.07, (-0.17, 0.3), p=0.566 | 0.13, (-0.11, 0.36), p=0.268 | 0.04, (-0.2, 0.27), p=0.771 | 0.78, (0.64, 0.86), p=0 | -0.02, (-0.27, 0.22), p=0.853 |
| **EndoCAb IgG** | 0.16, (-0.08, 0.38), p=0.192 | 0.22, (-0.02, 0.44), p=0.07 | 0.07, (-0.17, 0.3), p=0.566 | - | 0.23, (-0.01, 0.45), p=0.052 | 0.23, (-0.01, 0.45), p=0.054 | -0.14, (-0.36, 0.1), p=0.258 | 0.13, (-0.12, 0.37), p=0.296 |
| **EndoCAb IgM** | 0.01, (-0.23, 0.24), p=0.951 | 0, (-0.24, 0.23), p=0.972 | 0.13, (-0.11, 0.36), p=0.268 | 0.23, (-0.01, 0.45), p=0.052 | - | -0.14, (-0.36, 0.1), p=0.263 | -0.14, (-0.37, 0.09), p=0.231 | -0.05, (-0.29, 0.2), p=0.695 |
| **LBP** | 0.18, (-0.06, 0.4), p=0.137 | 0.36, (0.13, 0.55), p=0.002 | 0.04, (-0.2, 0.27), p=0.771 | 0.23, (-0.01, 0.45), p=0.054 | -0.14, (-0.36, 0.1), p=0.263 | - | -0.02, (-0.25, 0.21), p=0.854 | -0.05, (-0.29, 0.2), p=0.721 |
| **LPS/HDL** | -0.04, (-0.27, 0.2), p=0.767 | 0.01, (-0.23, 0.24), p=0.932 | 0.78, (0.64, 0.86), p=0 | -0.14, (-0.36, 0.1), p=0.258 | -0.14, (-0.37, 0.09), p=0.231 | -0.02, (-0.25, 0.21), p=0.854 | - | -0.04, (-0.29, 0.2), p=0.733 |
| **Calprotectin** | -0.16, (-0.39, 0.09), p=0.197 | -0.15, (-0.38, 0.11), p=0.256 | -0.02, (-0.27, 0.22), p=0.853 | 0.13, (-0.12, 0.37), p=0.296 | -0.05, (-0.29, 0.2), p=0.695 | -0.05, (-0.29, 0.2), p=0.721 | -0.04, (-0.29, 0.2), p=0.733 | - |

**Supplemental Table 4.** Correlations in the type 1 diabetes group. Spearman correlation coefficient (95% CI) was calculated.

| **Variable** | **CRO, mg/l** | **hsCRP, mg/l** | **LPS, EU/ml** | **endoCAb IgG, GMU/ml** | **endoCAb IgM, MMU/ml** | **LBP, µg/ml** | **LPS/HDL** | **Calprotectin, µg/g** |
| --- | --- | --- | --- | --- | --- | --- | --- | --- |
| **Serum glucose** | 0.2, (-0.15, 0.51), p=0.256 | -0.05, (-0.4, 0.31), p=0.778 | -0.13, (-0.46, 0.23), p=0.48 | -0.28, (-0.58, 0.08), p=0.119 | -0.24, (-0.55, 0.12), p=0.183 | 0.17, (-0.19, 0.49), p=0.343 | -0.21, (-0.52, 0.16), p=0.255 | -0.14, (-0.48, 0.23), p=0.449 |
| **HbA1c** | 0.34, (-0.02, 0.62), p=0.056 | 0.5, (0.16, 0.74), p=0.004 | -0.13, (-0.46, 0.23), p=0.483 | 0.15, (-0.21, 0.48), p=0.404 | 0.24, (-0.12, 0.55), p=0.183 | 0.18, (-0.18, 0.5), p=0.318 | -0.13, (-0.46, 0.23), p=0.487 | 0.17, (-0.21, 0.5), p=0.373 |
| **eGFR** | -0.22, (-0.53, 0.13), p=0.208 | -0.21, (-0.53, 0.16), p=0.249 | -0.11, (-0.44, 0.25), p=0.538 | 0.09, (-0.27, 0.43), p=0.619 | 0.06, (-0.29, 0.4), p=0.737 | -0.21, (-0.52, 0.15), p=0.248 | -0.09, (-0.43, 0.27), p=0.624 | -0.06, (-0.41, 0.31), p=0.772 |
| **Albumine/creatinine ratio in urine** | -0.26, (-0.56, 0.09), p=0.138 | -0.32, (-0.61, 0.05), p=0.081 | 0.02, (-0.33, 0.36), p=0.925 | 0.1, (-0.26, 0.44), p=0.578 | -0.19, (-0.51, 0.17), p=0.287 | -0.03, (-0.38, 0.32), p=0.865 | -0.02, (-0.37, 0.33), p=0.898 | 0.2, (-0.18, 0.52), p=0.298 |
| **Weight** | 0.39, (0.04, 0.65), p=0.026 | 0.19, (-0.18, 0.52), p=0.296 | 0.23, (-0.14, 0.54), p=0.211 | 0.04, (-0.31, 0.39), p=0.811 | -0.44, (-0.69, -0.09), p=0.012 | 0.12, (-0.24, 0.45), p=0.498 | 0.35, (-0.01, 0.63), p=0.05 | -0.02, (-0.38, 0.34), p=0.904 |
| **Body mass index** | 0.42, (0.07, 0.67), p=0.016 | 0.38, (0.02, 0.66), p=0.034 | 0.13, (-0.23, 0.46), p=0.476 | 0.08, (-0.27, 0.42), p=0.654 | -0.15, (-0.48, 0.21), p=0.405 | 0.16, (-0.2, 0.48), p=0.387 | 0.27, (-0.09, 0.57), p=0.136 | -0.1, (-0.45, 0.27), p=0.586 |
| **Waist/height ratio** | 0.37, (0.02, 0.64), p=0.034 | 0.33, (-0.04, 0.62), p=0.074 | 0.19, (-0.18, 0.5), p=0.309 | 0.08, (-0.28, 0.42), p=0.661 | -0.2, (-0.52, 0.16), p=0.267 | 0.27, (-0.1, 0.57), p=0.141 | 0.23, (-0.14, 0.54), p=0.21 | -0.15, (-0.49, 0.22), p=0.422 |
| **eGDR** | -0.34, (-0.62, 0.01), p=0.051 | -0.26, (-0.57, 0.11), p=0.16 | -0.25, (-0.56, 0.11), p=0.16 | -0.1, (-0.44, 0.26), p=0.574 | 0.14, (-0.22, 0.47), p=0.444 | -0.13, (-0.46, 0.23), p=0.479 | -0.32, (-0.61, 0.04), p=0.077 | -0.12, (-0.46, 0.25), p=0.534 |
| **HSI** | 0.46, (0.12, 0.7), p=0.007 | 0.43, (0.07, 0.69), p=0.016 | 0.09, (-0.26, 0.43), p=0.605 | 0.07, (-0.28, 0.41), p=0.697 | -0.08, (-0.42, 0.28), p=0.671 | 0.14, (-0.22, 0.46), p=0.456 | 0.24, (-0.12, 0.55), p=0.178 | -0.2, (-0.52, 0.18), p=0.3 |
| **FLI** | 0.38, (0.02, 0.64), p=0.031 | 0.24, (-0.13, 0.55), p=0.198 | 0.49, (0.16, 0.73), p=0.004 | 0.01, (-0.34, 0.36), p=0.958 | -0.42, (-0.68, -0.07), p=0.017 | 0.27, (-0.1, 0.57), p=0.14 | 0.54, (0.21, 0.76), p=0.002 | 0.01, (-0.35, 0.37), p=0.953 |
| **ALT** | 0.49, (0.16, 0.73), p=0.003 | 0.32, (-0.04, 0.61), p=0.076 | 0.12, (-0.24, 0.45), p=0.524 | 0.06, (-0.3, 0.4), p=0.764 | -0.1, (-0.43, 0.26), p=0.605 | 0.23, (-0.14, 0.54), p=0.215 | 0.31, (-0.06, 0.6), p=0.087 | -0.13, (-0.47, 0.24), p=0.48 |
| **AST** | 0.31, (-0.05, 0.59), p=0.081 | -0.02, (-0.38, 0.33), p=0.895 | 0, (-0.35, 0.35), p=0.986 | 0.33, (-0.03, 0.62), p=0.063 | -0.04, (-0.39, 0.31), p=0.819 | 0.18, (-0.18, 0.5), p=0.311 | 0.13, (-0.23, 0.46), p=0.493 | -0.13, (-0.47, 0.25), p=0.506 |
| **GGT** | 0.36, (0.01, 0.64), p=0.037 | 0.29, (-0.08, 0.59), p=0.119 | 0.16, (-0.2, 0.49), p=0.368 | 0.41, (0.05, 0.67), p=0.021 | 0.13, (-0.23, 0.46), p=0.486 | 0.21, (-0.15, 0.53), p=0.238 | 0.3, (-0.06, 0.59), p=0.097 | -0.02, (-0.38, 0.34), p=0.901 |
| **Transglutaminase IgA** | -0.4, (-0.66, -0.05), p=0.021 | -0.33, (-0.62, 0.04), p=0.07 | -0.11, (-0.44, 0.25), p=0.557 | 0.22, (-0.15, 0.53), p=0.235 | 0.07, (-0.28, 0.41), p=0.696 | -0.12, (-0.45, 0.24), p=0.518 | -0.02, (-0.37, 0.33), p=0.907 | 0.37, (0, 0.65), p=0.041 |
| **Total bilirubin** | -0.24, (-0.55, 0.11), p=0.173 | 0.04, (-0.32, 0.39), p=0.84 | 0.09, (-0.26, 0.43), p=0.609 | 0.35, (-0.01, 0.63), p=0.052 | 0.03, (-0.32, 0.38), p=0.863 | -0.13, (-0.46, 0.23), p=0.484 | -0.02, (-0.36, 0.33), p=0.921 | -0.19, (-0.52, 0.19), p=0.318 |
| **Erythrocytes** | 0.12, (-0.24, 0.44), p=0.511 | 0.02, (-0.33, 0.38), p=0.899 | 0.45, (0.1, 0.7), p=0.01 | 0.03, (-0.32, 0.38), p=0.855 | -0.37, (-0.64, -0.01), p=0.039 | 0.31, (-0.05, 0.6), p=0.084 | 0.5, (0.16, 0.73), p=0.004 | 0.17, (-0.2, 0.51), p=0.355 |
| **Hemoglobin** | -0.04, (-0.38, 0.31), p=0.839 | -0.19, (-0.51, 0.18), p=0.312 | 0.43, (0.08, 0.69), p=0.014 | -0.1, (-0.44, 0.26), p=0.579 | -0.4, (-0.67, -0.05), p=0.022 | 0.32, (-0.04, 0.61), p=0.074 | 0.51, (0.18, 0.74), p=0.003 | 0.21, (-0.16, 0.53), p=0.26 |
| **Leukocytes** | -0.2, (-0.51, 0.16), p=0.276 | -0.09, (-0.43, 0.27), p=0.614 | 0.32, (-0.04, 0.61), p=0.075 | -0.2, (-0.52, 0.16), p=0.273 | -0.05, (-0.4, 0.3), p=0.77 | 0.34, (-0.02, 0.62), p=0.057 | 0.33, (-0.03, 0.62), p=0.062 | 0.3, (-0.07, 0.6), p=0.103 |
| **Total cholesterol** | -0.06, (-0.39, 0.29), p=0.746 | -0.23, (-0.54, 0.14), p=0.221 | 0.07, (-0.29, 0.41), p=0.721 | -0.12, (-0.45, 0.24), p=0.515 | -0.17, (-0.5, 0.19), p=0.339 | 0.01, (-0.34, 0.36), p=0.95 | -0.12, (-0.45, 0.24), p=0.505 | -0.1, (-0.44, 0.27), p=0.615 |
| **High density cholestrol** | -0.24, (-0.55, 0.11), p=0.17 | -0.15, (-0.48, 0.21), p=0.409 | -0.32, (-0.61, 0.04), p=0.073 | -0.19, (-0.51, 0.17), p=0.302 | 0.18, (-0.19, 0.5), p=0.336 | -0.21, (-0.52, 0.15), p=0.245 | -0.68, (-0.84, -0.4), p=0 | -0.27, (-0.58, 0.1), p=0.144 |
| **Low density cholesterol** | -0.09, (-0.42, 0.27), p=0.637 | -0.21, (-0.52, 0.16), p=0.267 | -0.04, (-0.38, 0.31), p=0.836 | -0.05, (-0.4, 0.3), p=0.77 | -0.18, (-0.5, 0.18), p=0.322 | -0.01, (-0.36, 0.34), p=0.951 | -0.03, (-0.37, 0.32), p=0.872 | 0.16, (-0.21, 0.49), p=0.395 |
| **Tryglicerides** | 0.28, (-0.07, 0.57), p=0.112 | 0.06, (-0.31, 0.4), p=0.767 | 0.79, (0.57, 0.9), p=0 | -0.09, (-0.43, 0.27), p=0.614 | -0.6, (-0.8, -0.29), p=0 | 0.28, (-0.08, 0.58), p=0.118 | 0.67, (0.39, 0.84), p=0 | 0.17, (-0.2, 0.5), p=0.363 |
| **CRP** | - | 0.42, (0.06, 0.68), p=0.018 | 0.05, (-0.31, 0.39), p=0.796 | -0.02, (-0.37, 0.33), p=0.895 | -0.01, (-0.35, 0.34), p=0.973 | -0.02, (-0.36, 0.33), p=0.92 | 0.14, (-0.22, 0.46), p=0.455 | -0.22, (-0.54, 0.16), p=0.241 |
| **hsCRP** | 0.42, (0.06, 0.68), p=0.018 | - | 0.23, (-0.14, 0.54), p=0.217 | 0.1, (-0.26, 0.44), p=0.584 | 0.19, (-0.18, 0.51), p=0.308 | 0.21, (-0.16, 0.53), p=0.254 | 0.2, (-0.17, 0.52), p=0.269 | -0.22, (-0.55, 0.17), p=0.252 |
| **LPS** | 0.05, (-0.31, 0.39), p=0.796 | 0.23, (-0.14, 0.54), p=0.217 | - | -0.09, (-0.43, 0.27), p=0.627 | -0.41, (-0.67, -0.06), p=0.021 | 0.36, (0, 0.64), p=0.045 | 0.86, (0.71, 0.94), p=0 | 0.15, (-0.23, 0.49), p=0.432 |
| **EndoCab IgG** | -0.02, (-0.37, 0.33), p=0.895 | 0.1, (-0.26, 0.44), p=0.584 | -0.09, (-0.43, 0.27), p=0.627 | - | 0.11, (-0.25, 0.44), p=0.565 | -0.29, (-0.59, 0.07), p=0.103 | -0.02, (-0.37, 0.33), p=0.897 | 0, (-0.36, 0.37), p=0.984 |
| **EndoCab IgM** | -0.01, (-0.35, 0.34), p=0.973 | 0.19, (-0.18, 0.51), p=0.308 | -0.41, (-0.67, -0.06), p=0.021 | 0.11, (-0.25, 0.44), p=0.565 | - | -0.05, (-0.39, 0.3), p=0.775 | -0.28, (-0.58, 0.08), p=0.117 | -0.21, (-0.54, 0.17), p=0.267 |
| **LBP** | -0.02, (-0.36, 0.33), p=0.92 | 0.21, (-0.16, 0.53), p=0.254 | 0.36, (0, 0.64), p=0.045 | -0.29, (-0.59, 0.07), p=0.103 | -0.05, (-0.39, 0.3), p=0.775 | - | 0.39, (0.03, 0.66), p=0.03 | -0.08, (-0.44, 0.29), p=0.673 |
| **LPS/HDL** | 0.14, (-0.22, 0.46), p=0.455 | 0.2, (-0.17, 0.52), p=0.269 | 0.86, (0.71, 0.94), p=0 | -0.02, (-0.37, 0.33), p=0.897 | -0.28, (-0.58, 0.08), p=0.117 | 0.39, (0.03, 0.66), p=0.03 | - | 0.21, (-0.18, 0.54), p=0.284 |
| **Calprotectin** | -0.22, (-0.54, 0.16), p=0.241 | -0.22, (-0.55, 0.17), p=0.252 | 0.15, (-0.23, 0.49), p=0.432 | 0, (-0.36, 0.37), p=0.984 | -0.21, (-0.54, 0.17), p=0.267 | -0.08, (-0.44, 0.29), p=0.673 | 0.21, (-0.18, 0.54), p=0.284 | - |

**Supplemental Table 5.** Correlations in the control group. Spearman correlation coefficient (95% CI) was calculated.


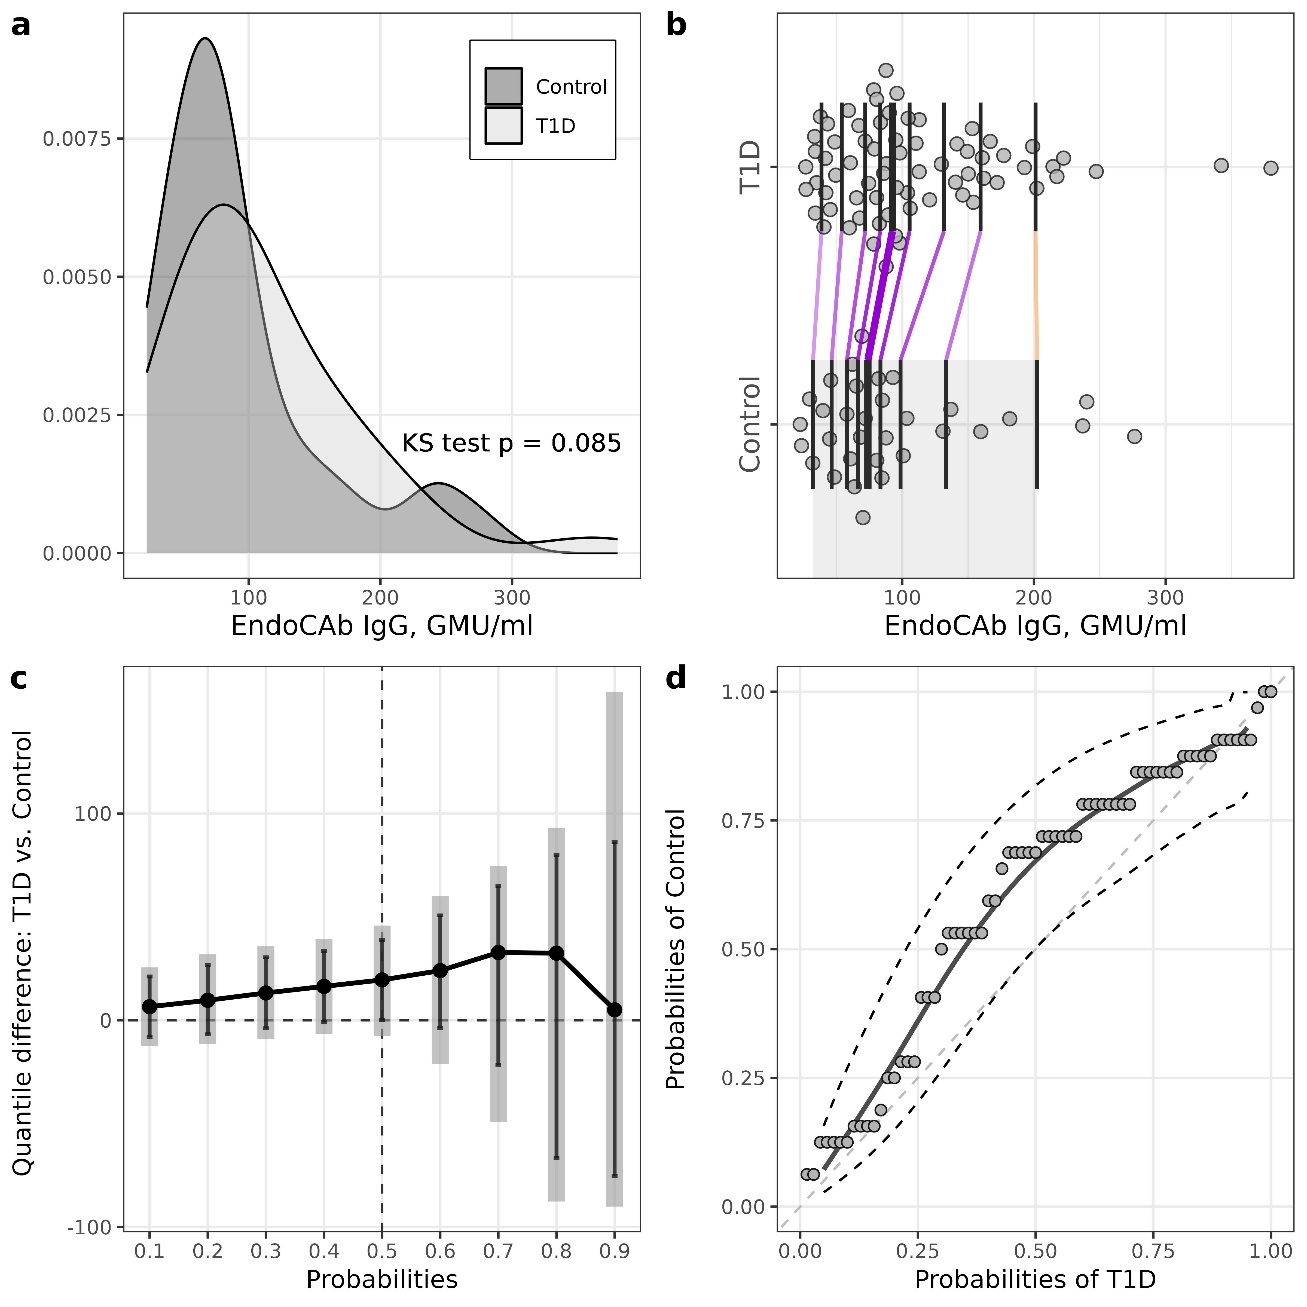


**Supplemental Figure 2.** Illustrations for comparison of EndoCAb IgG levels between control and T1D groups. a – plots of densities in control and T1D, p-value of Kolmogorov-Smirnov (KS) test for the equality of distributions; b – one-dimensional scatterplots for control and T1D, vertical bars represents deciles of both groups (R library rogme); c – quantile difference (T1D - control) plot constructed at deciles, estimates obtained using two-sample smoothed empirical likelihood method (R library EL), error bars represent 95% pointwise CI’s, shaded bars representing 95% simultaneous confidence bands for 9 deciles; d – probabilities of T1D versus probabilities of control (PP-plot) with estimate and 95% pointwise CI’s obtained by two-sample smoothed empirical likelihood method (R library EL). Bandwidths for kernel estimation in c and d were selected using method by Sheather and Jones (function bw.SJ in R).
